# Supplementary material for: ROS-responsive self-assembly nanoplatform overcomes hypoxia for enhanced photodynamic therapy
Source: Royal Society of Chemistry journal article supplement (doi:10.1039/d4bm00712c), 2024-01-01
Supplement: d4bm00712c1.pdf [file d4bm00712c1.pdf]

## *Supporting Information*

### **ROS-responsive self-assembly nanoplatform overcomes hypoxia for enhanced photodynamic therapy**

*Zhaojie Zhou*<sup>1, a</sup>, *Jiayi Han*<sup>1, a</sup>, *Puxin Lang*<sup>a</sup>, *Mengxing Zhang*<sup>a</sup>, *Haozhou Shu*<sup>a</sup>,  
*Ling Zhang*<sup>a, b \*</sup>, *Shiqi Huang*<sup>a\*</sup>

a College of Polymer Science and Engineering, Sichuan University, Chengdu 610000, China;

b Med-X Center for Materials, Sichuan University, Chengdu 610000, China;

\* Correspondence Authors. E-mail: zhangling83@scu.edu.cn, huangshiqi@scu.edu.cn

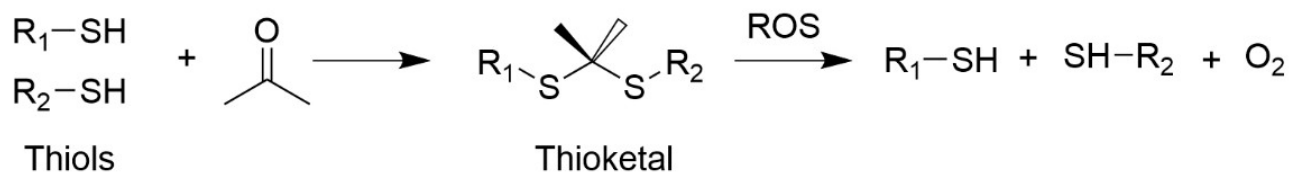

**Figure S1.** The schematic diagram of synthesis of TK and degradation of TK groups by ROS.

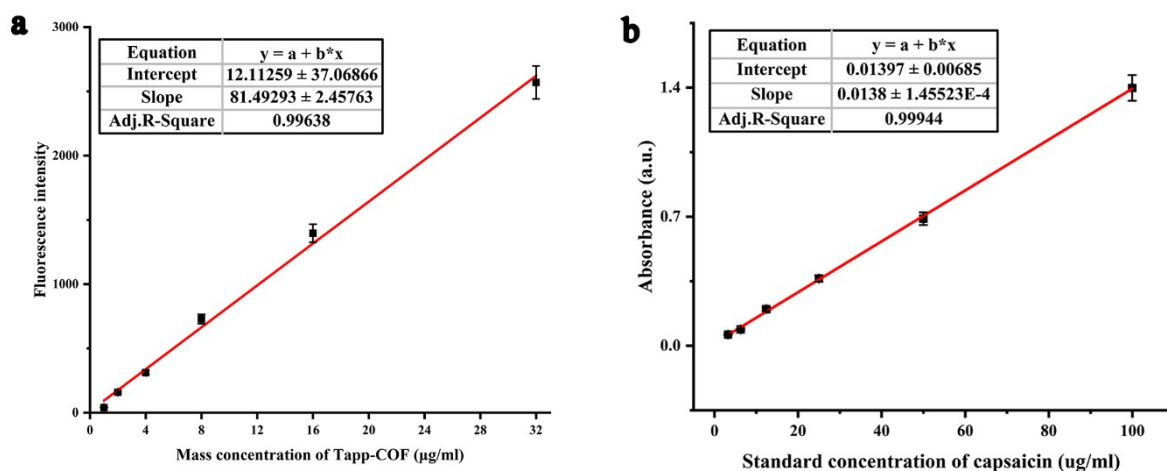

**Figure S2.** a) Standard curve of Tapp-COF (Fluorescence intensity - Mass concentration.  $R^2 = 0.99$ ). b) Standard curve (Absorbance - Mass concentration) of capsaicin.  $R^2 = 0.99$ .

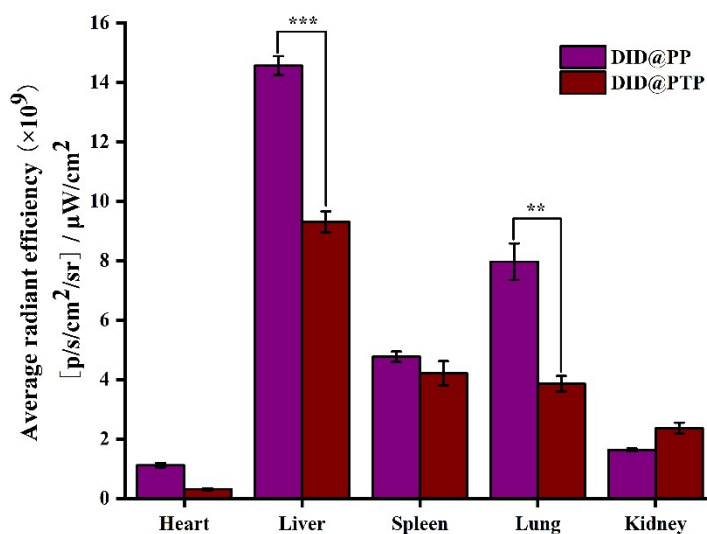

**Figure S3.** Semi-quantitative analysis of fluorescence of the ex vivo organs from tumor-bearing mice after administration of various preparations (mean  $\pm$  SD,  $n=3$ ).

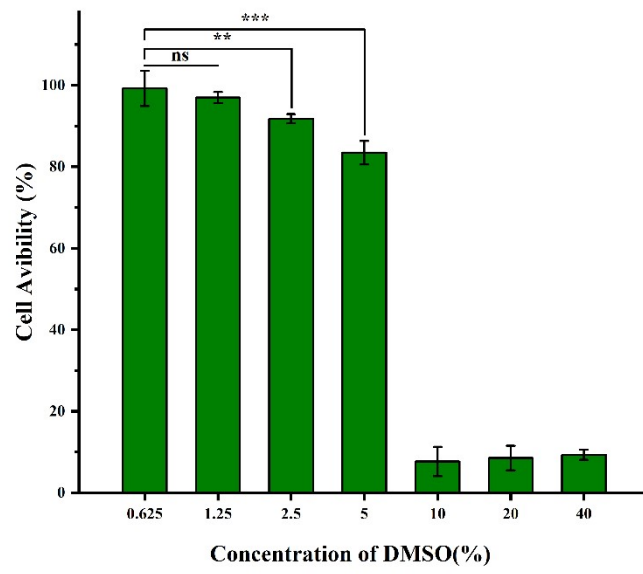

**Figure S4.** The cytotoxicity of co-solvent DMSO.

**Tabel S1. Study on the irritation of capsaicin injected into mice (n = 3).**

| Indicator | Concentration ( $\mu\text{g/ml}$ ) | Anesthesia | Short-term behavioral characteristics | Survival 24h after injection |
|-----------|------------------------------------|------------|---------------------------------------|------------------------------|
| Capsaicin | 70                                 | -          | Very manic                            | 1                            |
|           | 7                                  | -          | More manic                            | 2                            |
|           | 70                                 | +          | Quiet                                 | 3                            |
|           | 7                                  | +          | Quiet                                 | 3                            |
| Ca-TC@PTP | 70                                 | -          | Quiet                                 | 3                            |
|           | 7                                  | -          | Quiet                                 | 3                            |

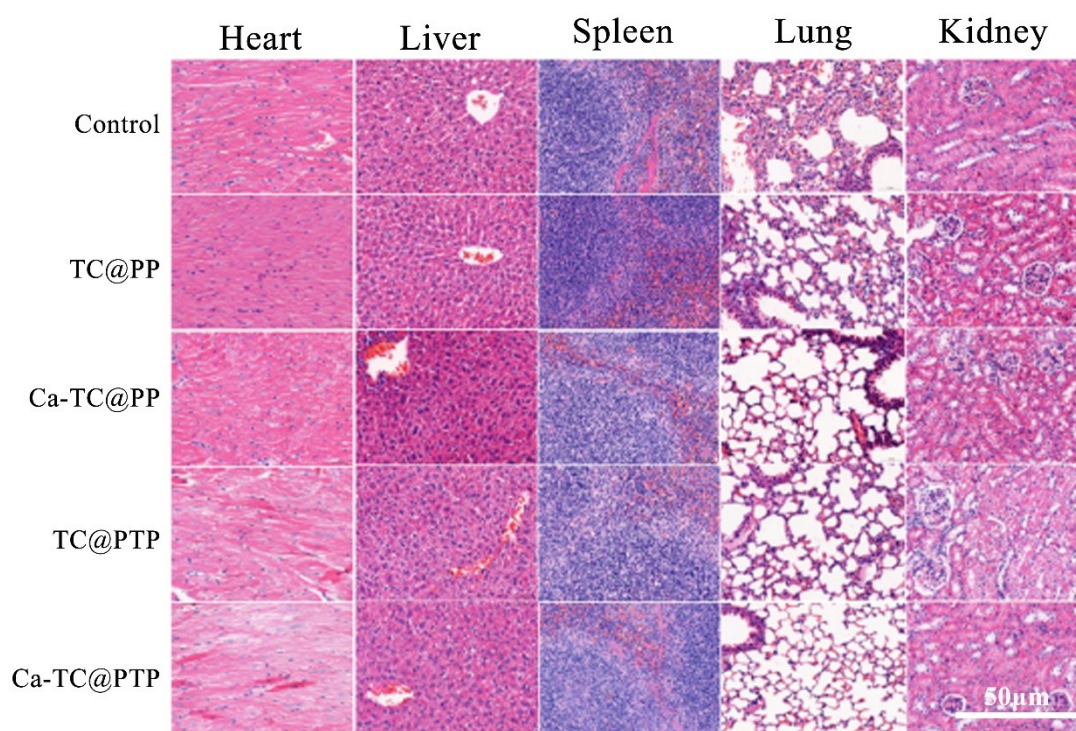

**Figure S5.** Internal organs tissue sections of mice in the treatment group. All images were captured by 400× magnification.
